# Supplementary material for: MiR-221 promotes stemness of breast cancer cells by targeting DNMT3b
Source: PubMed Central journal article supplement (PMC4808019; doi:10.18632/oncotarget.5979), 2015-10-19
Supplement: oncotarget-07-0580-s001.pdf [file oncotarget-07-0580-s001.pdf]

SUPPLEMENTARY FIGURES AND TABLES

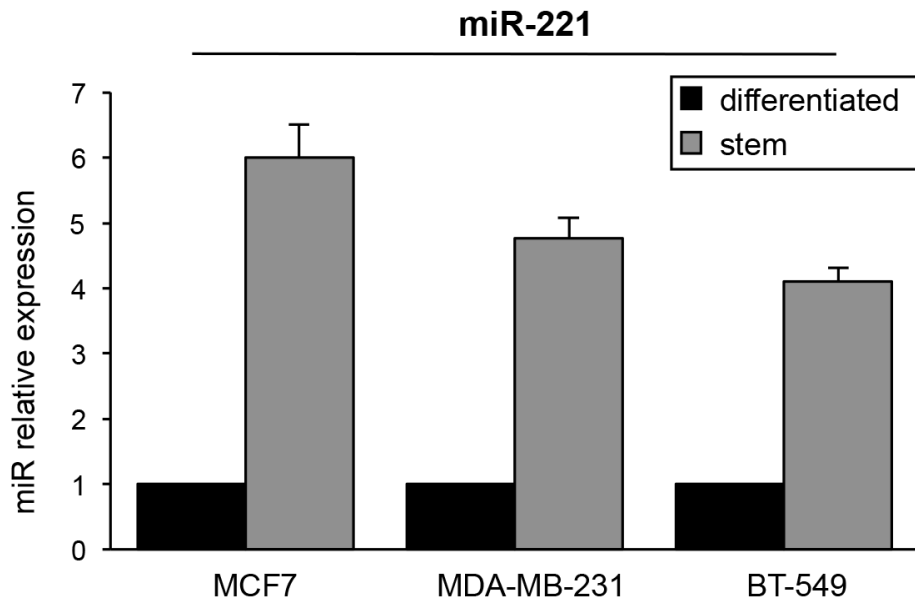

**Supplementary Figure S1: MiR-221 expression in MCF7, MDA-MB-231, BT-549 breast cancer cells.** qRT-PCR revealed the upregulation of miR-221 in breast mammospheres with respect to differentiated cells. The experiment was repeated twice.

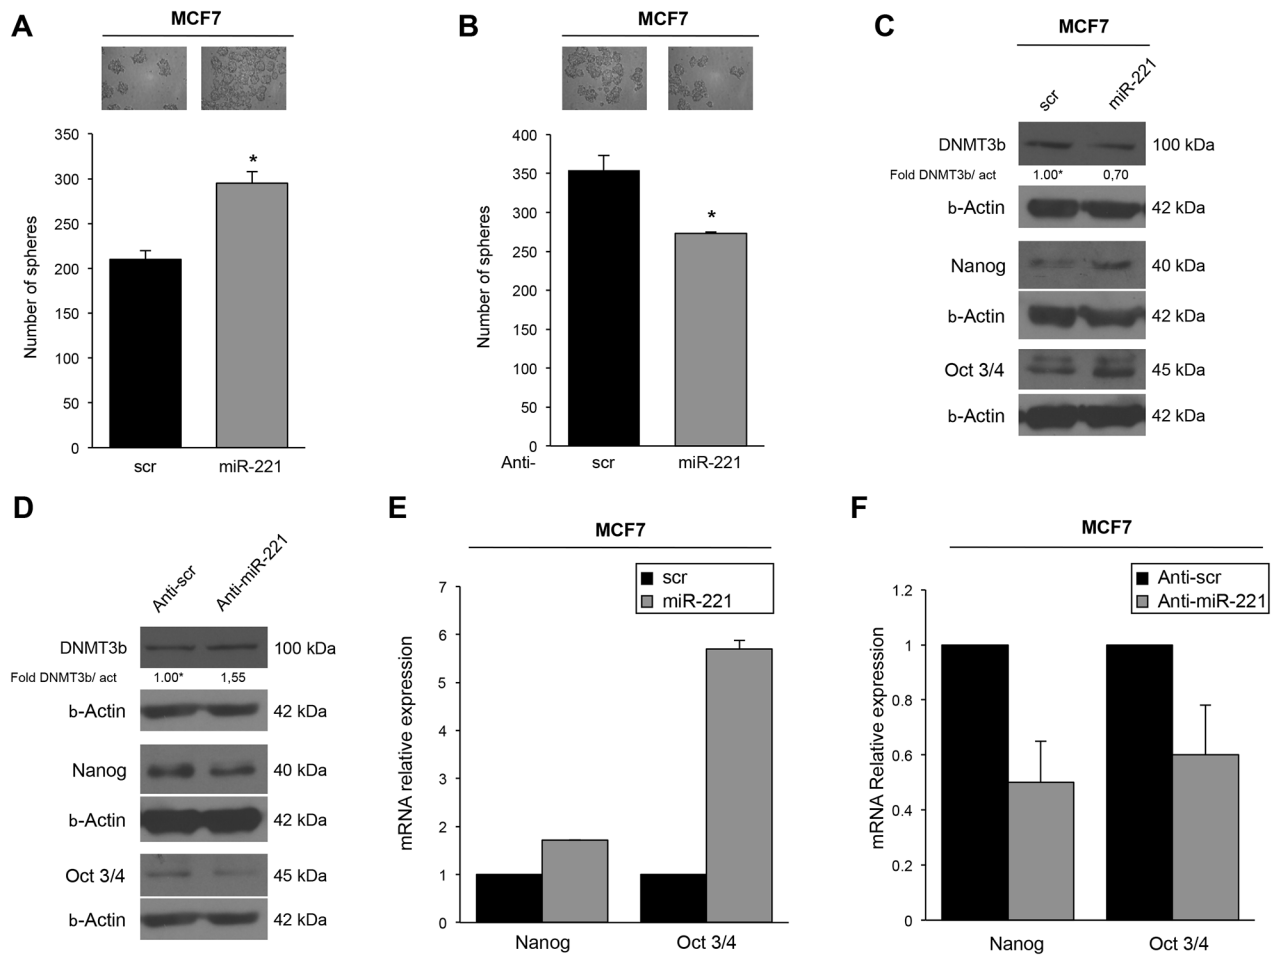

**Supplementary Figure S2: Effect of miR-221 expression on stemness properties in MCF7 cells.** A, B. MCF7 cells were transfected with a pre-miR or anti-miR, and mammosphere counted after 6 days. MiR-221 induced an increase in the number of mammospheres ( $295 \pm SD$  versus  $210 \pm SD$ ), whereas anti-miR-221 transfection induced a reduction of mammospheres ( $273 \pm SD$  versus  $354 \pm SD$ ). C, E. Western blot and qRT-PCR showing that pre-miR-221 transfected in MCF7 cells upregulates stem cell marker expression. D, F. whereas anti-miR-221 has an opposite effect. Western blot analyses are representative experiments. In A and B, Data are mean values  $\pm$  SD of three independent experiments. Significance was calculated using Student's *t*-test. \*,  $p < 0.05$ .

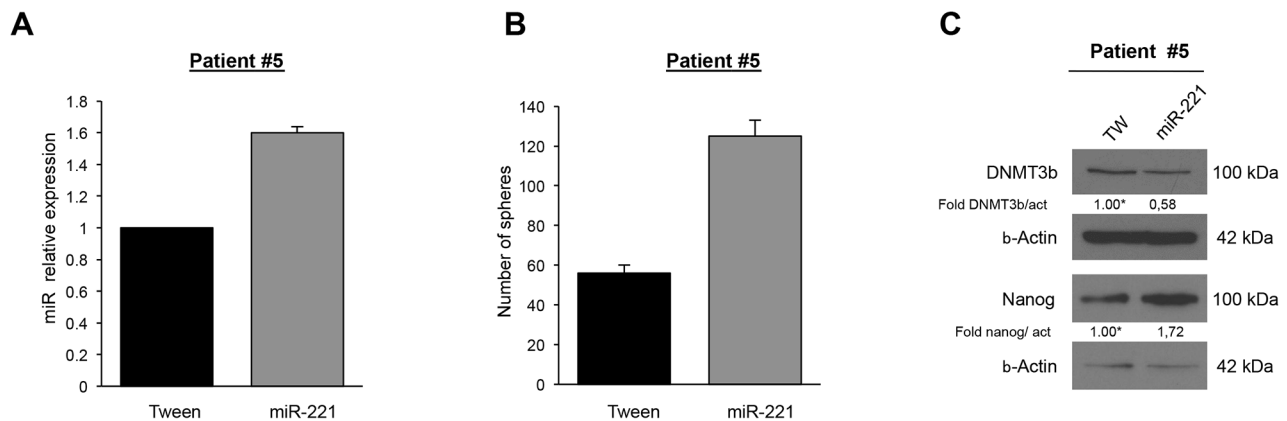

**Supplementary Figure S3: Effect of stable expression of miR-221 on stemness in primary cells.** A. Stable expression of miR-221 in patient #5 was confirmed by real time PCR. B. Stable expression of miR-221 upregulated the number of mammospheres in primary breast cancer cells. C. MiR-221 infection induced a decrease of DNMT3 and an increase of Nanog, as assessed by Western blot. The experiments were repeated at least twice.

**A**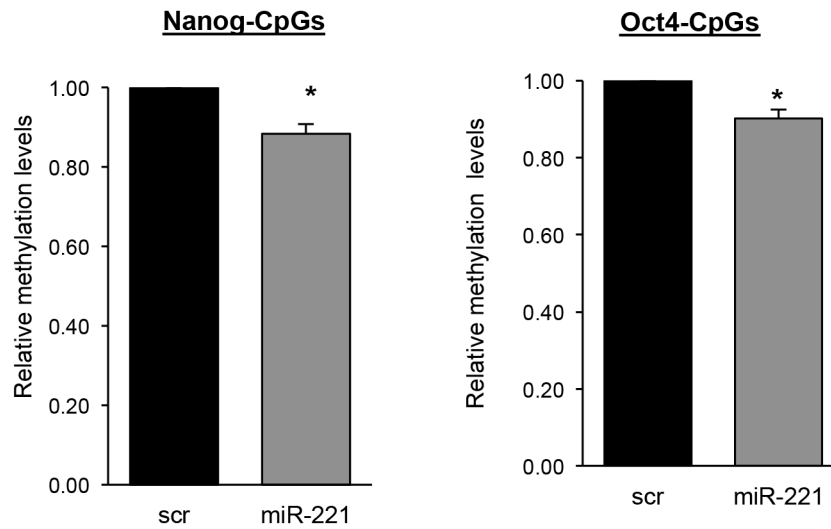**B**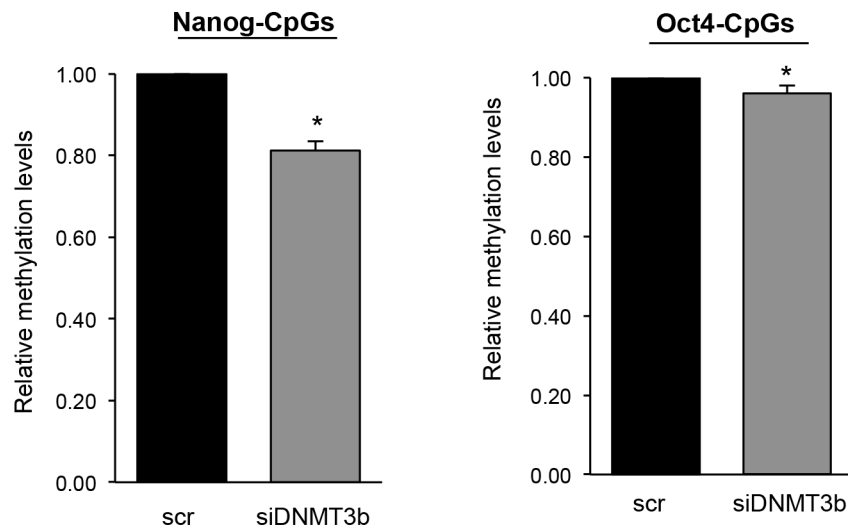

**Supplementary Figure S4: Pyrosequencing analysis of CpGs of Nanog and Oct 3/4 promoter regions.** **A.** Analysis of methylation change on CpGs of *Nanog* and *Oct 3/4* promoters after miR-221 expression (10%). **B.** Analysis of methylation change on CpGs of *Nanog* and *Oct 3/4* promoters after DNMT3b siRNA (20% and 5% respectively). Methylation values: mean of consecutive CpGs. Significance was calculated using *U*-Mann Whitney test. \*,  $p < 0.05$ .

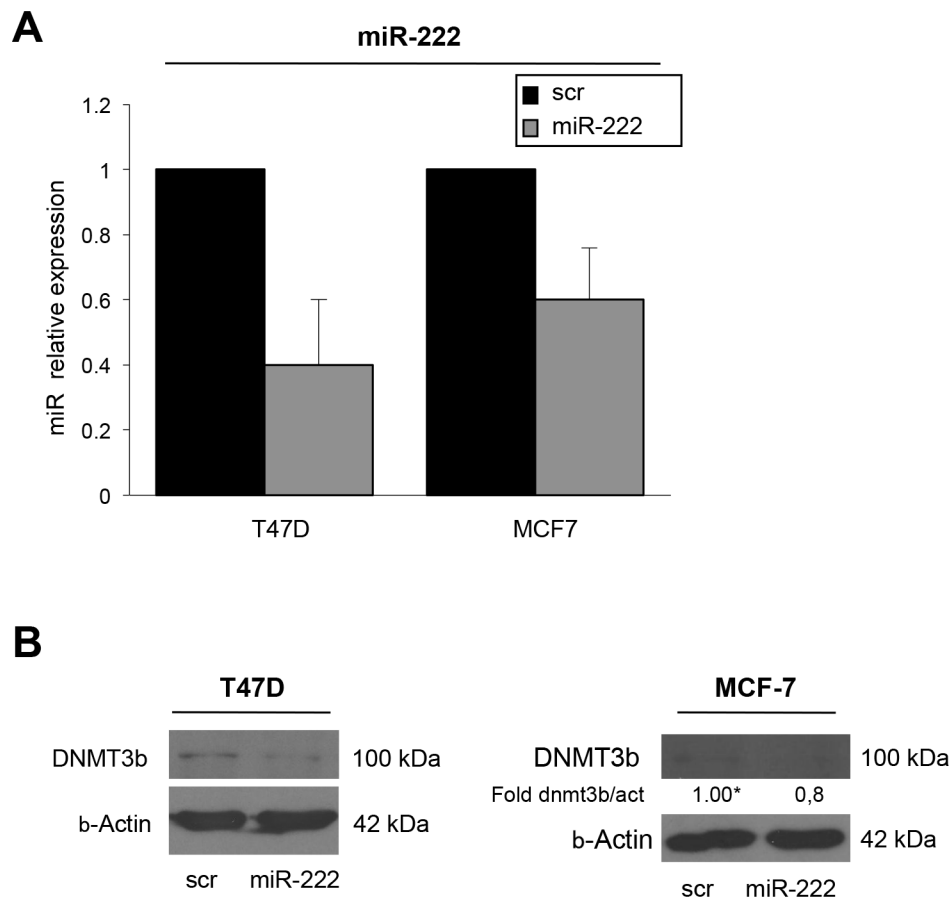

**Supplementary Figure S5: Effect of miR-222 on DNMT3b expression.** A. miR-222 transfection downregulated DNMT3b mRNA and B. protein levels, as assessed by qRT-PCR and Western Blot both in T47D than MCF7. Western blots are from representative experiments.

**Supplementary Table S1: Primary breast cancer cells were injected into the flank of nude mice in the indicated number**

|                | Patient | Cell number injected | Xenograft formation |
|----------------|---------|----------------------|---------------------|
| Spheres        | 1-2-3-4 | $3 \times 10^5$      | Yes                 |
| Adherent cells | 1-2-3-4 | $2 \times 10^6$      | No                  |

Tumor formation was observed after 4 weeks only when sphere cells were injected.

**Supplementary Table S2: Primer sequences for pyrosequencing analysis**

| Pyrosequencing primers          | Sequence                                   |
|---------------------------------|--------------------------------------------|
| Nanog Reverse 1                 | CCTACATAATAACATAAAAACAACCAACTCA            |
| Nanog Forward 1                 | [Bio]AAGTATTTGTTGTTGGGTTTGTTTT TAGG        |
| Nanog Sequencing 1              | TTAAACCCACCCCTC                            |
| Nanog Reverse 2                 | [Bio]AAAATAACTACAAAATAACCCAAACTAAAT        |
| Nanog Forward 2                 | TTTTTAATTTATTGGGATTATAGGGGTGGG             |
| Nanog Sequencing 2              | ATTATAGGGGTGGGT                            |
| OCT-4 Reverse 1                 | [Bio]CCCCATCRAAATTACTCTCCACCC              |
| OCT-4 Forward 1                 | TTGGGT TAGGTTTTGAGGTGT                     |
| OCT-4 Sequencing 1              | GGGGGATTTTTTTTATGTTT                       |
| OCT-4 Reverse 2/OCT-4 Forward 2 | [Bio]CCCCCACAAA ACTCATACTTAGGTGGTGGAGGTGAT |
| OCT-4 Sequencing 2              | GTGGAGGTGATGGGT                            |
| OCT-4 Reverse 3                 | [Bio]CCATCAA ACTACCCTATCATAACC             |
| OCT-4 Forward 3                 | TGGAGTGGGGTTAGTGTT                         |
| OCT-4 Sequencing 3              | GGGGTTAGTGTTTTAAG                          |

(1) indicates primers used for the first analysis;

(2–3) indicate primers used for the second analysis.
